# Supplementary material
Source: PubMed Central journal article supplement (PMC4527540)
Supplement: NIHMS695773-supplement.pdf [file NIHMS695773-supplement.pdf]

**Appendix A1.** A bundle used by the Department of Ophthalmology to identify intraoperative complications mentioned in the surgeons' notes. This bundle has one search term and 51 additional terms and phrases to exclude to reduce the number of false positives when searching through the notes for a set of patients during a specified month.

**Bundle Name:** Surgical complications for ophthalmology

**Description:** To detect mentions of intraoperative surgical complications

**Terms to include in search:**

Complications

**Terms to exclude from search:**

|                                                                           |
|---------------------------------------------------------------------------|
| "without any significant complications"                                   |
| "low risk for any perioperative cardiac complications"                    |
| "risk of major cardiac complications"                                     |
| "no history of anesthesia or operative complications"                     |
| "associated with postoperative pulmonary complications"                   |
| "no significant increased risk for postoperative pulmonary complications" |
| "complications of diabetes"                                               |
| "uncontrolled, with neurologic complications"                             |
| "prevent other medical complications"                                     |
| "Biomedical conditions and complications"                                 |
| "cognitive conditions and complications"                                  |
| "complications of surgery and staying"                                    |
| "you can prevent these complications"                                     |
| "type 2 with complications"                                               |
| "Complications: No"                                                       |
| "Diabetes with neurologic complications"                                  |
| "complications from influenza"                                            |
| "complications, benefits"                                                 |
| "Intra-Sedation Complications Sedation Discharge Criteria"                |
| "complications can occur"                                                 |
| "no postoperative complications"                                          |
| "COMPLICATIONS: No complications"                                         |
| "Denies complications"                                                    |
| "care was exercised to prevent any complications"                         |
| "no obvious complications"                                                |
| "no apparent complications"                                               |

|                                                  |
|--------------------------------------------------|
| "no immediate complications"                     |
| "complications: no immediate complications"      |
| "problems or complications"                      |
| "without any immediate complications"            |
| "complications and alternatives"                 |
| "no preoperative or postoperative complications" |
| "risk and complications"                         |
| "risks and complications"                        |
| "low risk for any complications"                 |
| "risk of complications"                          |
| "risk of recurrence and complications"           |
| "complications of the surgery were discussed"    |
| "no operative complications"                     |
| "no intraoperative complications"                |
| "complications were discussed"                   |
| "complications of surgery were discussed"        |
| "or other complications"                         |
| "reduce side-effects and complications"          |
| "without any complications"                      |
| "without complications"                          |
| "no complications"                               |
| "complications: (none)"                          |
| "complications: 0"                               |
| "complications: none"                            |
| "No post-op complications"                       |

**Appendix A2.** A bundle showing 28 terms used to identify symptoms of apathy or indifference in a study looking at neuropsychiatric symptoms in dementia patients. The creator of this bundle had met with geriatric psychiatrists to obtain input about the kinds of behaviors/symptoms that they would mention in their notes. In this bundle the colors were assigned by the system.

**Bundle Name:** Apathy or Indifference

**Description:** These terms refer to apathy or indifference.

**Terms to include in search:**

- "flat mood"
- unmotivated
- apathy
- indifference
- indifferent
- unhappiness
- "lack of motivation"
- withdrawn
- "isolating self"
- isolate\*
- Motivation
- motivate
- passivity
- passive
- disengaged
- "not engaged"
- Engaged
- "couch potato"
- Uninterested
- Disinterested
- Interested
- "flat affect"
- "lost interest"
- "does not initiate"
- Initiate
- Initiative
- "look\* forward"
- Participate

**Terms to exclude from search:** None

**Appendix A3.** A bundle developed by the hematopoietic cell transplant (HCT) team to identify patients with infections for a study. Some of the terms representing similar concepts are grouped by color. This bundle contains 70 search terms.

**Bundle Name:** HCT-CI Infection

**Description:** hematopoietic cell transplant-comorbidity index - infection

**Terms to include in search:**

culture

abscess

"Quanti Feron"

PPD

"TB-Gold"

Mantoux

"TB Gold"

TST

"Tuberculin skin test"

"Tuberculin sensitivity test"

QuantiFeron

"Quanti-Feron"

"asymptomatic bacteriuria"

"symptomatic bacteriuria"

bacturia

"bacteria in the urine"

"urine bacteria"

bacteriuria

empiric

"acid fast bacilli"

"acid fast bacillus"

"acid-fast bacilli"

"acid-fast bacillus"

AFB

"TB test"

"purified protein derivative"

"positive PPD"

bacterimia

septic

bacteraemia

septicemia

setpecemia  
septicemia  
"positive blood culture"  
"positive blood cultures"  
"severe sepsis"  
bactermia  
"septic shock"  
toxemia  
urosepsis  
bacterimic  
bacteremic  
sepsis  
pneuonia  
pneumonia  
pnuemonia  
pnemonia  
peumonia  
pnenomia  
pneumona  
pneumonaie  
pneumonai  
PNA  
"miliary TB"  
"Mycobacterium tuberculosis"  
^"TB"  
tuberculoma  
"miliary tuberculosis"  
Mycobacterium  
"Tubercles Bacillus"  
"disseminated TB"  
mycobacteria  
"disseminated tuberculosis"  
tuberculosis  
"fungal infection"  
"fungal PNA"  
"fungal pneumonia"  
"fever of undertermined origin"

"fever of unknown origin"

FUO

**Terms to exclude from search:** None

## Appendix B. Peer-reviewed publications assisted with the use of EMERSE, 2007–2014

| Publication Title                                                                                                                                | The way EMERSE was used                                                                                                                                           | Journal                         | Year of Publishing | PubMed Identifier |
|--------------------------------------------------------------------------------------------------------------------------------------------------|-------------------------------------------------------------------------------------------------------------------------------------------------------------------|---------------------------------|--------------------|-------------------|
| Anticoagulant Complications in Facial Plastic and Reconstructive Surgery                                                                         | Data abstraction from operative and other notes for wound healing, infection, bleeding, return to the operating room, and other factors.                          | JAMA Facial Plast Surg          | 2014               | 25541679          |
| Proton pump inhibitors and histamine 2 blockers are associated with improved overall survival in patients with head and neck squamous carcinoma. | To identify mentions of medications taken by the patients in the study.                                                                                           | Cancer Prev Res                 | 2014               | 25468899          |
| Transcutaneous biopsy of adrenocortical carcinoma is rarely helpful in diagnosis, potentially harmful, but does not affect patient outcome       | To obtain data about staging, reason for biopsy, number of biopsies, institution performing the biopsy, complications, and other factors.                         | Eur J Endocrinol                | 2014               | 24836548          |
| Engraftment syndrome after allogeneic hematopoietic cell transplantation predicts poor outcomes                                                  | To identify patients with engraftment syndrome using a set of 82 search terms                                                                                     | Biol Blood Marrow Transplant    | 2014               | 24892262          |
| Osteochondromas after radiation for pediatric malignancies: a role for expanded counseling for skeletal side effects                             | To identify patient who developed osteochondromas after hematopoietic stem cell transplant and total body irradiation                                             | J Pediatr Orthop                | 2014               | 23965908          |
| Unbiased identification of patients with disorders of sex development                                                                            | Chart reviews to locate features described in the notes that helped identify patients with disorders of sex development                                           | PLoS One                        | 2014               | 25268640          |
| Changes in characteristics of hepatitis C patients seen in a liver centre in the United States during the last decade                            | Medical records review which included treatment status and clinical status at the time of presentation                                                            | J Viral Hepat                   | 2014               | 25311830          |
| Symptomatic subcapsular and perinephric hematoma following ureteroscopic lithotripsy for renal calculi                                           | Chart review of clinical notes to identify patients whose surgery was complicated by a symptomatic hematoma                                                       | J Endourol                      | 2014               | 25025758          |
| Comparison of Second-Echelon Treatments for Ménière's Disease                                                                                    | Data abstraction for and identification of patients with Ménière's Disease                                                                                        | JAMA Otolaryngol Head Neck Surg | 2014               | 25057891          |
| A Combined Paging Alert and Web-Based Instrument Alters Clinician Behavior and Shortens Hospital Length of Stay in Acute Pancreatitis            | Finding data of interest for chart reviews.                                                                                                                       | Am J Gastroenterol              | 2014               | 24594946          |
| Adjuvant therapies, patient and tumor characteristics associated with survival of adult patients with adrenocortical carcinoma                   | Chart reviews for a variety of clinical parameters including stage, pathology data, evaluation of hormone secretion, surgical approach, and treatment modalities. | J Clin Endocrinol Metab         | 2014               | 24302750          |
| Population-based incidence and prevalence of systemic lupus erythematosus: The Michigan Lupus Epidemiology & Surveillance (MILES) Program        | Data abstraction for a variety of clinical characteristics for patients with systemic lupus erythematosus.                                                        | Arthritis Rheum                 | 2014               | 24504809          |

|                                                                                                                                                                    |                                                                                                                                                                                |                               |      |          |
|--------------------------------------------------------------------------------------------------------------------------------------------------------------------|--------------------------------------------------------------------------------------------------------------------------------------------------------------------------------|-------------------------------|------|----------|
| The association between race and gender, treatment attitudes, and antidepressant treatment adherence                                                               | Eligibility determination based on chart review by considering factors such as clinically significant depression and having a new recommendation for antidepressant treatment. | Int J Geriatr Psychiatry      | 2014 | 23801324 |
| Aneurysms in abdominal organ transplant recipients                                                                                                                 | To identify patients with mention of an arterial aneurysm in the clinical documentation among patients undergoing liver or kidney transplants over an 11 year period.          | J Vasc Surg                   | 2014 | 24246534 |
| Suicide risk assessment received prior to suicide death by Veterans Health Administration patients with a history of depression                                    | Data abstraction to identify suicide attempts and suicidal ideation                                                                                                            | J Clin Psychiatry             | 2013 | 23561227 |
| Head and neck squamous cell carcinoma in pregnant women                                                                                                            | To identify all women who had a head and neck squamous cell carcinoma during pregnancy.                                                                                        | Head Neck                     | 2013 | 22422571 |
| Primary care for adults with Down syndrome: adherence to preventive healthcare recommendations                                                                     | To identify patients who had Downs syndrome and one of several comorbidities including congenital heart disease, hypothyroidism, and atlanto-axial instability.                | J Intellect Disabil Res       | 2013 | 22463763 |
| Health care in adults with Down syndrome: a longitudinal cohort study                                                                                              | To identify patients with Down syndrome and one of several comorbidities.                                                                                                      | J Intellect Disabil Res       | 2013 | 22775057 |
| Rapid reduction of central line infections in hospitalized pediatric oncology patients through simple quality improvement methods                                  | Data abstraction related to positive blood cultures in pediatric oncology patients with central line infections.                                                               | Pediatr Blood Cancer          | 2013 | 22522576 |
| Hypertension, obesity and prostate cancer biochemical recurrence after radical prostatectomy                                                                       | To identify patients who had hypertension or diabetes before their diagnosis of prostate cancer.                                                                               | Prostate Cancer Prostatic Dis | 2013 | 22907512 |
| Risk factors for surgical site infection in pediatric cardiac surgery patients undergoing delayed sternal closure                                                  | To identify children who had delayed sternal closure among a larger cohort who had cardiac surgery.                                                                            | J Thorac Cardiovasc Surg      | 2013 | 23102685 |
| Prevalence and natural history of arachnoid cysts in adults                                                                                                        | Data abstraction for adults with arachnoid cysts. EMERSE was used to search over 48,000 patient records.                                                                       | J Neurosurg                   | 2013 | 23140149 |
| The factors associated with high-quality communication for critically ill children                                                                                 | To identify documentation of prognostic, goals-of-care conversations for patients in the pediatric intensive care unit.                                                        | Pediatrics                    | 2013 | 23457155 |
| Risk models for post-endoscopic retrograde cholangiopancreatography pancreatitis (PEP): smoking and chronic liver disease are predictors of protection against PEP | Data abstraction for factors such as alcohol and tobacco use, presence of cardiovascular disease, body mass index, and aspirin use.                                            | Pancreas                      | 2013 | 23532001 |
| Racial differences in adherence to antidepressant treatment in later life                                                                                          | To aid in recruitment for patients with depression to study antidepressant adherence.                                                                                          | Am J Geriatr Psychiatry       | 2013 | 23602306 |
| Utility of a clinical practice guideline in treatment of chylothorax in the postoperative congenital heart patient                                                 | To identify patients who had a chylothorax among those who had undergone congenital heart surgery.                                                                             | Ann Thorac Surg               | 2013 | 23915583 |
| Fidelity of administrative data when researching down syndrome                                                                                                     | To identify patients with Downs syndrome who had not been classified as such with administrative codes.                                                                        | Med Care                      | 2013 | 23358384 |



|                                                                                                                                                                               |                                                                                                                                                                                                                 |                              |      |          |
|-------------------------------------------------------------------------------------------------------------------------------------------------------------------------------|-----------------------------------------------------------------------------------------------------------------------------------------------------------------------------------------------------------------|------------------------------|------|----------|
| A comparison of particulate and onyx embolization in preoperative devascularization of juvenile nasopharyngeal angiofibromas                                                  | Data abstraction for tumor stage, resection approach, blood transfusion requirements, blood loss, and other clinical outcomes.                                                                                  | Neuroradiology               | 2013 | 23748913 |
| Describing the relationship between cat bites and human depression using data from an electronic health record                                                                | Verification of patients who had cat bites as well as determining other factors such how the cat was known to the person being bit.                                                                             | PLoS One                     | 2013 | 23936453 |
| Accuracy of hospital administrative data in reporting central line-associated bloodstream infections in newborns                                                              | Identification of patients with central line associated bloodstream infections using a list of 22 terms and phrases.                                                                                            | Pediatrics                   | 2013 | 23457153 |
| Is early clinical evidence of autonomic shift predictive of infection after aneurysmal subarachnoid hemorrhage                                                                | To identify infectious complications in patients who had an Aneurysmal Subarachnoid Hemorrhage                                                                                                                  | J Stroke Cerebrovasc Dis     | 2013 | 24189451 |
| Outcomes associated with balloon angioplasty for recurrent coarctation in neonatal univentricular and biventricular Norwood-type aortic arch reconstructions                  | To identify patient who developed a coarctation requiring intervention using six distinct terms and phrases.                                                                                                    | Catheter Cardiovasc Interv   | 2013 | 24323365 |
| Retrospective chart review of catatonia in child and adolescent psychiatric patients                                                                                          | Searched for key terms to identify patients with aggression, agitation, reduced or stereotyped movements, reduced speech, loss of appetite, and other clinical concepts.                                        | Acta Psychiatr Scand         | 2012 | 22040029 |
| Validation of key behaviourally based mental health diagnoses in administrative data: suicide attempt, alcohol abuse, illicit drug abuse and tobacco use                      | To identify patients with suicide attempts. Tobacco use, alcohol use, abuse, or dependence and illicit drug use was also sought.                                                                                | BMC Health Serv Res          | 2012 | 22270080 |
| Plasma biomarkers of lower gastrointestinal and liver acute GVHD                                                                                                              | Data abstraction for clinical characteristics in a study seeking biomarkers to identify acute graft versus host disease.                                                                                        | Blood                        | 2012 | 22286196 |
| Natural history and imaging prevalence of cavernous malformations in children and young adults                                                                                | Collected clinical and imaging data by searching through 15,000 patient records to identify patients with cavernous malformations.                                                                              | J Neurosurg Pediatr          | 2012 | 22295927 |
| TNF-inhibition with etanercept for graft-versus-host disease prevention in high-risk HCT: lower TNFR1 levels correlate with better outcomes                                   | Data abstraction for patient characteristics and outcomes related to a study to prevent graft versus host disease.                                                                                              | Biol Blood Marrow Transplant | 2012 | 22469883 |
| Junctional ectopic tachycardia after infant heart surgery: incidence and outcomes                                                                                             | To identify patients who had junctional ectopic tachycardia and then conduct a chart review for further inclusion and exclusion criteria.                                                                       | Pediatr Cardiol              | 2012 | 22585344 |
| Triple receptor-negative breast cancer: imaging and clinical characteristics                                                                                                  | To determine when the patients were last seen at the health system.                                                                                                                                             | AJR Am J Roentgenol          | 2012 | 22826413 |
| Predictors of suicide in patient charts among patients with depression in the Veterans Health Administration health system: importance of prescription drug and alcohol abuse | Data abstraction from the Veterans Affairs system for patients who had committed suicide. Clinical characteristics included diagnoses, substance abuse, life stressors, suicide attempts, and prior treatments. | J Clin Psychiatry            | 2012 | 23140657 |
| Sleep-disordered breathing in multiple sclerosis                                                                                                                              | To search for polysomnographic reports among patients who had been seen at a multiple sclerosis clinic.                                                                                                         | Neurology                    | 2012 | 22895593 |

|                                                                                                                                                     |                                                                                                                                                                                  |                                                 |      |          |
|-----------------------------------------------------------------------------------------------------------------------------------------------------|----------------------------------------------------------------------------------------------------------------------------------------------------------------------------------|-------------------------------------------------|------|----------|
| Retrospective database research in pediatric cardiology and congenital heart surgery: an illustrative example of limitations and possible solutions | To identify and conduct chart reviews in patients with junctional ectopic tachycardia.                                                                                           | World J Pediatr Congenit Heart Surg             | 2012 | 23804858 |
| Do clinical characteristics predict the presence of small bowel angioectasias on capsule endoscopy?                                                 | Data abstraction for a variety of clinical parameters including history of anti-inflammatory therapy, presence of hypertension, and the presence of arteriovenous malformations. | Dig Dis Sci                                     | 2011 | 21153439 |
| The effect of age on arteriovenous malformations in children and young adults undergoing magnetic resonance imaging                                 | To identify patients with arteriovenous malformations from a set of nearly 15,000 patients.                                                                                      | Childs Nerv Syst                                | 2011 | 21442267 |
| Clinical course of sepsis in children with acute leukemia admitted to the pediatric intensive care unit                                             | To identify patients admitted to the pediatric intensive care unit, as well as to identify those who had sepsis.                                                                 | Pediatr Crit Care Med                           | 2011 | 21478790 |
| Prevalence and natural history of pineal cysts in adults                                                                                            | Data abstraction for adults with pineal cysts. EMERSE was used to search over 48,000 patient records.                                                                            | J Neurosurg                                     | 2011 | 21780858 |
| Chiari malformation Type I and syrinx in children undergoing magnetic resonance imaging                                                             | Data abstraction regarding Chiari Type I malformations and syrinx in children, by searching over 14,000 patient records.                                                         | J Neurosurg Pediatr                             | 2011 | 21806364 |
| Natural history of Chiari malformation Type I following decision for conservative treatment                                                         | Data abstraction for clinical outcomes in patients with Chiari malformations Type I.                                                                                             | J Neurosurg Pediatr                             | 2011 | 21806365 |
| Clofarabine and busulfan conditioning facilitates engraftment and provides significant antitumor activity in nonremission hematologic malignancies  | Data abstraction for clinical characteristics.                                                                                                                                   | Blood                                           | 2011 | 21841163 |
| Regenerating islet-derived 3-alpha is a biomarker of gastrointestinal graft-versus-host disease                                                     | Data abstraction for clinical outcomes in a study to determine if regenerating islet-derived 3-alpha is a biomarker for graft versus host disease.                               | Blood                                           | 2011 | 21979939 |
| Progression of noncirrhotic portal hypertension in a pediatric population                                                                           | Data abstraction.                                                                                                                                                                | Journal of Clinical and Experimental Hepatology | 2011 | *        |
| Should heart, lung, and liver transplant recipients receive immunosuppression induction for kidney transplantation?                                 | Data abstraction for clinical characteristics about patients who had a liver, lung, or heart transplant.                                                                         | Clin Transplant                                 | 2010 | 19222505 |
| Obesity and angiolymphatic invasion in primary breast cancer                                                                                        | Data abstraction for clinical and pathology information for patients with breast cancer.                                                                                         | Ann Surg Oncol                                  | 2010 | 19898898 |
| The natural history of pineal cysts in children and young adults                                                                                    | Data abstraction for clinical characteristics of patients with pineal cysts.                                                                                                     | J Neurosurg Pediatr                             | 2010 | 20121364 |
| Frequency of CD4(+)CD25(hi)FOXP3(+) regulatory T cells has diagnostic and prognostic value as a biomarker for acute graft-versus-host-disease       | Data abstraction to obtain clinical characteristics on patients with graft versus host disease.                                                                                  | Biol Blood Marrow Transplant                    | 2010 | 20302964 |
| Elafin is a biomarker of graft-versus-host disease of the skin                                                                                      | Data abstraction for patient characteristics in a study to identify a biomarker for graft versus host disease.                                                                   | Sci Transl Med                                  | 2010 | 20371463 |

|                                                                                                                                                                                  |                                                                                                                                                                                         |                               |      |          |
|----------------------------------------------------------------------------------------------------------------------------------------------------------------------------------|-----------------------------------------------------------------------------------------------------------------------------------------------------------------------------------------|-------------------------------|------|----------|
| Prevalence and natural history of arachnoid cysts in children                                                                                                                    | Data abstraction regarding characteristics of arachnoid cysts. The authors scanned the records of over 11,700 patients using EMERSE.                                                    | J Neurosurg<br>Pediatr        | 2010 | 20515330 |
| Combination of thiopurines and allopurinol: adverse events and clinical benefit in IBD                                                                                           | Data abstraction for patients with irritable bowel disease who had received both thiopurines and allopurinol, including infections and other diagnoses.                                 | J Crohns Colitis              | 2010 | 21122542 |
| Implementation of the Quality Oncology Practice Initiative at a university comprehensive cancer center.                                                                          | Data abstraction for cancer quality measures.                                                                                                                                           | J Clin Oncol                  | 2009 | 19487377 |
| A biomarker panel for acute graft-versus-host disease                                                                                                                            | Data abstraction for clinical characteristics of patients with graft versus host disease.                                                                                               | Blood                         | 2009 | 18832652 |
| Marijuana use in potential liver transplant candidates                                                                                                                           | Data abstraction for patients with organ transplants.                                                                                                                                   | Am J Transplant               | 2009 | 19067667 |
| Outcomes after auto-SCT in African Americans with multiple myeloma                                                                                                               | Data abstraction for clinical characteristics of patients with multiple myeloma.                                                                                                        | Bone Marrow Transplant        | 2009 | 19139731 |
| Alcohol use and cigarette smoking as risk factors for post-endoscopic retrograde cholangiopancreatography pancreatitis                                                           | Data abstraction using a wide variety of search terms related to smoking, pancreatitis, and other comorbid conditions.                                                                  | Clin Gastroenterol<br>Hepatol | 2009 | 19168153 |
| Long-term outcomes following myeloablative allogeneic transplantation for multiple myeloma compared to autologous transplantation and the impact of graft-versus-myeloma effect. | Data abstraction to identify factors related to survival in patients with graft versus host disease.                                                                                    | Bone Marrow Transplant        | 2009 | 19204708 |
| Right-sided congenital diaphragmatic hernia: high utilization of extracorporeal membrane oxygenation and high survival                                                           | Data abstraction for patient with a congenital diaphragmatic hernia regarding birth history, anatomy, extracorporeal membrane oxygenation use, details about the surgery, and outcomes. | J Pediatr Surg                | 2009 | 19433162 |
| Chylothorax after congenital diaphragmatic hernia repair                                                                                                                         | Data abstraction for patients with congenital diaphragmatic hernia including details about the surgery and outcomes.                                                                    | J Pediatr Surg                | 2009 | 19524736 |
| Combination drug therapy improves compliance of the neurogenic bladder                                                                                                           | Data abstraction for patient information including neurological disease status and function, and urological surgeries.                                                                  | J Urol                        | 2009 | 19616807 |
| Etanercept plus methylprednisolone as initial therapy for acute graft-versus-host disease                                                                                        | Data abstraction for clinical outcomes related to a trial to treat graft-versus-host disease.                                                                                           | Blood                         | 2008 | 18042798 |
| Incremental costs of post-liver transplantation complications                                                                                                                    | Data abstraction to determine outcomes related solid organ transplantation.                                                                                                             | J Am Coll Surg                | 2008 | 18155573 |
| Biliary complications following liver transplantation in the model for end-stage liver disease era: effect of donor, recipient, and technical factors                            | Data abstraction for liver transplant patients.                                                                                                                                         | Liver Transpl                 | 2008 | 18161843 |
| Comparison of histidine-tryptophan-ketoglutarate and University of Wisconsin preservation in renal transplantation                                                               | Data abstraction for factors related to organ transplants.                                                                                                                              | Am J Transplant               | 2008 | 18162093 |

|                                                                                           |                                                                                                         |                    |      |          |
|-------------------------------------------------------------------------------------------|---------------------------------------------------------------------------------------------------------|--------------------|------|----------|
| The effects of donor and recipient practices on transplant center finances                | Data abstraction about medical conditions and other donor characteristics related to organ transplants. | Am J Transplant    | 2008 | 18294154 |
| Financial implications of surgical complications in pediatric liver transplantation       | Data abstraction for patient characteristics regarding pediatric solid organ donor transplantation.     | Pediatr Transplant | 2008 | 18307665 |
| Early urologic complications after pediatric renal transplant: a single-center experience | Data abstraction regarding kidney donor and recipient characteristics.                                  | Transplantation    | 2008 | 19077890 |
| Is routine ureteral stenting cost-effective in renal transplantation?                     | Data abstraction for patients with urinary complications.                                               | J Urol             | 2007 | 17937936 |

\* Article not in PubMed. DOI: 10.1016/S0973-6883(11)60234-X
